# Supplementary material
Source: PubMed Central journal article supplement (PMC7969396)
Supplement: NIHMS1652036-supplement-Supplement.pdf [file NIHMS1652036-supplement-Supplement.pdf]

**Title: Adolescent use of hair dyes, straighteners and perms in relation to breast cancer risk**

**Authors:** Alexandra J. White, Allyson M. Gregoire, Kyla W. Taylor, Carolyn Eberle, Symielle Gaston, Katie M. O'Brien, Chandra L. Jackson, Dale P. Sandler

**Supplemental Material Table of Contents:**

**Table S1.** Study population characteristics at baseline by race/ethnicity and chemical straightener use, Sister Study, 2003-2009.....Pg 2

**Table S2.** Associations between hair product use between the ages of 10-13 years and breast cancer risk by ER status, Sister Study, 2003-2018.....Pg 3

**Table S3.** Associations between hair product use between the ages of 10-13 years and breast cancer risk by extent, Sister Study, 2003-2018.....Pg 4

**Table S1.** Study population characteristics at baseline by race/ethnicity and chemical straightener use, Sister Study, 2003-2009

| Characteristic                        | Non-Hispanic white (N =39,542) |                  |                   |                  | Black (N=4,300)   |                  |                   |                  |
|---------------------------------------|--------------------------------|------------------|-------------------|------------------|-------------------|------------------|-------------------|------------------|
|                                       | Straightener Use               |                  | Perm Use          |                  | Straightener Use  |                  | Perm Use          |                  |
|                                       | None<br>N (col %)              | Any<br>N (col %) | None<br>N (col %) | Any<br>N (col %) | None<br>N (col %) | Any<br>N (col %) | None<br>N (col %) | Any<br>N (col %) |
| Age                                   |                                |                  |                   |                  |                   |                  |                   |                  |
| ≤45                                   | 4618 (12.3%)                   | 114 (8.4%)       | 3224 (13.5%)      | 1469 (10.3%)     | 135 (13.8%)       | 521 (17.4%)      | 578 (15.9%)       | 77 (22.8%)       |
| 46-49                                 | 5524 (14.7%)                   | 226 (16.7%)      | 4763 (19.9%)      | 931 (6.5%)       | 141 (14.4%)       | 544 (18.2%)      | 610 (16.8%)       | 73 (21.7%)       |
| 50-54                                 | 6871 (18.3%)                   | 509 (37.7%)      | 5106 (21.4%)      | 2162 (15.2%)     | 211 (21.6%)       | 677 (22.7%)      | 801 (22.1%)       | 84 (24.9%)       |
| 55-59                                 | 7386 (19.7%)                   | 381 (28.2%)      | 4172 (17.5%)      | 3421 (24%)       | 233 (23.9%)       | 621 (20.8%)      | 797 (22%)         | 61 (18.1%)       |
| 60-64                                 | 5975 (15.9%)                   | 84 (6.2%)        | 2916 (12.2%)      | 2988 (21%)       | 148 (15.2%)       | 396 (13.3%)      | 513 (14.1%)       | 30 (8.9%)        |
| ≥65                                   | 7169 (19.1%)                   | 36 (2.7%)        | 3698 (15.5%)      | 3271 (23%)       | 108 (11.1%)       | 229 (7.7%)       | 328 (9%)          | 12 (3.6%)        |
| Age at menarche, mean (SD)            | 12.7 (1.5)                     | 12.5 (1.47)      | 12.7 (1.48)       | 12.6 (1.52)      | 12.7 (1.81)       | 12.4 (1.69)      | 12.5 (1.72)       | 12.2 (1.83)      |
| Household education during early life |                                |                  |                   |                  |                   |                  |                   |                  |
| Less than High School Degree          | 5371 (14.3%)                   | 119 (8.8%)       | 3066 (12.8%)      | 2275 (16%)       | 379 (38.8%)       | 1098 (36.7%)     | 1384 (38.2%)      | 97 (28.8%)       |
| High School Degree                    | 13789 (36.7%)                  | 522 (38.7%)      | 8507 (35.6%)      | 5532 (38.8%)     | 353 (36.2%)       | 1053 (35.2%)     | 1294 (35.7%)      | 115 (34.1%)      |
| Some College/Technical School         | 7377 (19.6%)                   | 255 (18.9%)      | 4490 (18.8%)      | 2971 (20.9%)     | 137 (14%)         | 486 (16.3%)      | 543 (15%)         | 77 (22.8%)       |
| Bachelor's Degree or Higher           | 11006 (29.3%)                  | 454 (33.6%)      | 7816 (32.7%)      | 3464 (24.3%)     | 107 (11%)         | 351 (11.7%)      | 406 (11.2%)       | 48 (14.2%)       |
| Household income during early life    |                                |                  |                   |                  |                   |                  |                   |                  |
| Well off                              | 2531 (6.7%)                    | 149 (11%)        | 1889 (7.9%)       | 751 (5.3%)       | 36 (3.7%)         | 81 (2.7%)        | 106 (2.9%)        | 10 (3%)          |
| Middle Income                         | 23648 (63%)                    | 886 (65.6%)      | 15261 (63.9%)     | 8794 (61.7%)     | 413 (42.3%)       | 1234 (41.3%)     | 1484 (40.9%)      | 159 (47.2%)      |
| Low income                            | 9174 (24.4%)                   | 270 (20%)        | 5388 (22.6%)      | 3853 (27.1%)     | 338 (34.6%)       | 1120 (37.5%)     | 1350 (37.2%)      | 113 (33.5%)      |
| Poor                                  | 2190 (5.8%)                    | 45 (3.3%)        | 1341 (5.6%)       | 844 (5.9%)       | 189 (19.4%)       | 553 (18.5%)      | 687 (18.9%)       | 55 (16.3%)       |

**Table S2.** Associations between hair product use between the ages of 10-13 years and breast cancer risk by ER status, Sister Study, 2003-2018.

| Frequency of hair product use<br>between the ages of 10-13 years | ER+                |                                      | ER-              |                                      | p-value <sup>b</sup> |
|------------------------------------------------------------------|--------------------|--------------------------------------|------------------|--------------------------------------|----------------------|
|                                                                  | Cases<br>(N=2,477) | Adjusted HR <sup>a</sup><br>(95% CI) | Cases<br>(N=443) | Adjusted HR <sup>a</sup><br>(95% CI) |                      |
| Permanent dye use                                                |                    |                                      |                  |                                      |                      |
| None                                                             | 2367               | 1.00 (referent)                      | 426              | 1.00 (referent)                      |                      |
| Sometimes or frequently                                          | 65                 | 0.99 (0.78, 1.27)                    | 11               | 0.87 (0.48, 1.58)                    | 0.7                  |
| Semi-permanent dye use                                           |                    |                                      |                  |                                      |                      |
| None                                                             | 2385               | 1.00 (referent)                      | 424              | 1.00 (referent)                      |                      |
| Sometimes or frequently                                          | 42                 | 0.78 (0.58, 1.06)                    | 13               | 1.29 (0.74, 2.24)                    | 0.1                  |
| Temporary hair dye use                                           |                    |                                      |                  |                                      |                      |
| None                                                             | 2374               | 1.00 (referent)                      | 424              | 1.00 (referent)                      |                      |
| Sometimes or frequently                                          | 53                 | 0.78 (0.60, 1.03)                    | 11               | 0.89 (0.49, 1.62)                    | 0.7                  |
| Bleach use                                                       |                    |                                      |                  |                                      |                      |
| None                                                             | 2335               | 1.00 (referent)                      | 417              | 1.00 (referent)                      |                      |
| Sometimes or frequently                                          | 96                 | 0.96 (0.78, 1.18)                    | 19               | 1.06 (0.67, 1.69)                    | 0.7                  |
| Straightener use                                                 |                    |                                      |                  |                                      |                      |
| None                                                             | 2246               | 1.00 (referent)                      | 392              | 1.00 (referent)                      |                      |
| Sometimes                                                        | 104                | 0.98 (0.80, 1.22)                    | 18               | 0.86 (0.52, 1.43)                    |                      |
| Frequently                                                       | 87                 | 1.08 (0.80, 1.46)                    | 27               | 1.61 (0.88, 2.96)                    |                      |
| <i>p for trend</i>                                               |                    | 0.7                                  |                  | 0.3                                  | 0.3                  |
| Permanent wave use (perm)                                        |                    |                                      |                  |                                      |                      |
| None                                                             | 1507               | 1.00 (referent)                      | 267              | 1.00 (referent)                      |                      |
| Sometimes                                                        | 796                | 1.04 (0.95, 1.13)                    | 149              | 1.20 (0.97, 1.48)                    |                      |
| Frequently                                                       | 82                 | 1.14 (0.91, 1.42)                    | 15               | 1.26 (0.75, 2.13)                    |                      |
| <i>p for trend</i>                                               |                    | 0.2                                  |                  | 0.08                                 | 0.5                  |

<sup>a</sup>adjusted for race, household education and income at age 13

<sup>b</sup> p-for-heterogeneity from a Wald test of hair product by subtype interaction terms in a joint Cox model

**Table S3.** Associations between hair product use between the ages of 10-13 years and breast cancer risk by extent, Sister Study, 2003-2018.

| Frequency of hair product use<br>between the ages of 10-13 years | Invasive          |                                      | DCIS             |                                      |
|------------------------------------------------------------------|-------------------|--------------------------------------|------------------|--------------------------------------|
|                                                                  | Cases<br>(N=2640) | Adjusted HR <sup>a</sup><br>(95% CI) | Cases<br>(N=731) | Adjusted HR <sup>a</sup><br>(95% CI) |
| Permanent dye use                                                |                   |                                      |                  |                                      |
| None                                                             | 2518              | 1.00 (referent)                      | 698              | 1.00 (referent)                      |
| Sometimes or frequently                                          | 72                | 1.04 (0.82, 1.31)                    | 15               | 0.75 (0.45, 1.25)                    |
| Semi-permanent dye use                                           |                   |                                      |                  |                                      |
| None                                                             | 2530              | 1.00 (referent)                      | 703              | 1.00 (referent)                      |
| Sometimes or frequently                                          | 55                | 0.97 (0.74, 1.26)                    | 9                | 0.55 (0.28, 1.06)                    |
| Temporary hair dye use                                           |                   |                                      |                  |                                      |
| None                                                             | 2523              | 1.00 (referent)                      | 694              | 1.00 (referent)                      |
| Sometimes or frequently                                          | 62                | 0.86 (0.66, 1.10)                    | 17               | 0.87 (0.53, 1.40)                    |
| Bleach use                                                       |                   |                                      |                  |                                      |
| None                                                             | 2479              | 1.00 (referent)                      | 685              | 1.00 (referent)                      |
| Sometimes or frequently                                          | 107               | 1.03 (0.85, 1.25)                    | 28               | 0.96 (0.65, 1.40)                    |
| Straightener use                                                 |                   |                                      |                  |                                      |
| None                                                             | 2376              | 1.00 (referent)                      | 639              | 1.00 (referent)                      |
| Sometimes                                                        | 114               | 0.98 (0.80, 1.21)                    | 34               | 0.94 (0.64, 1.37)                    |
| Frequently                                                       | 102               | 1.09 (0.82, 1.44)                    | 43               | 1.30 (0.82, 2.06)                    |
| <i>p for trend</i>                                               |                   | 0.7                                  |                  | 0.4                                  |
| Permanent wave use (perm)                                        |                   |                                      |                  |                                      |
| None                                                             | 1597              | 1.00 (referent)                      | 466              | 1.00 (referent)                      |
| Sometimes                                                        | 853               | 1.05 (0.97, 1.15)                    | 214              | 0.99 (0.83, 1.17)                    |
| Frequently                                                       | 95                | 1.24 (1.01, 1.53)                    | 15               | 0.72 (0.43, 1.21)                    |
| <i>p for trend</i>                                               |                   | 0.04                                 |                  | 0.4                                  |

<sup>a</sup>adjusted for race, household education and income at age 13
